# Supplementary material
Source: PubMed Central journal article supplement (PMC3924897)

### Change in NASH-CRN Steatosis Score

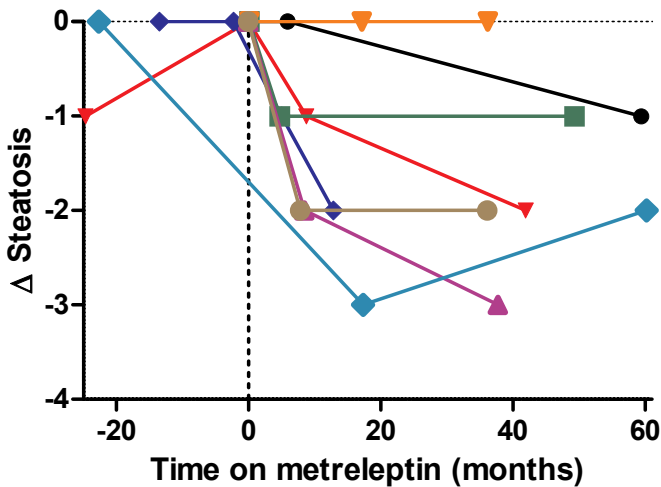

### Change in NASH-CRN Fibrosis Score

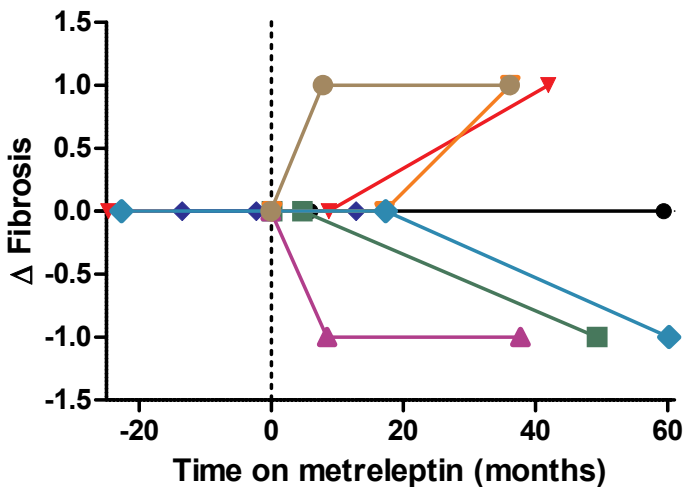

### Change in NASH-CRN NAFLD Activity Score

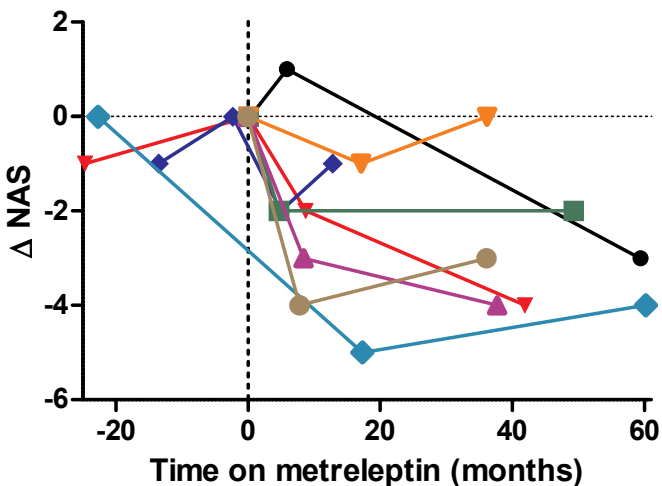

Supplement: NIHMS464012-supplement-02.pdf [file NIHMS464012-supplement-02.pdf]
